# Supplementary material
Source: PubMed Central journal article supplement (PMC4248800)
Supplement: JB.02019-14_zjb999093336so1.pdf [file JB.02019-14_zjb999093336so1.pdf]

**A**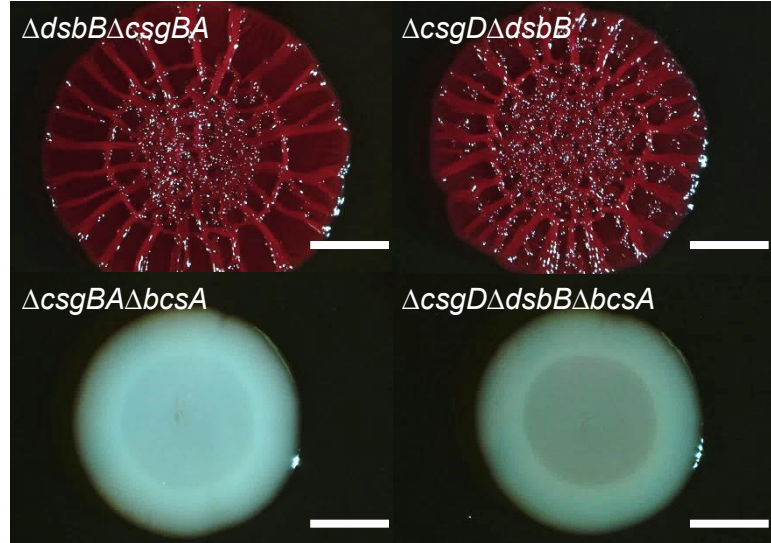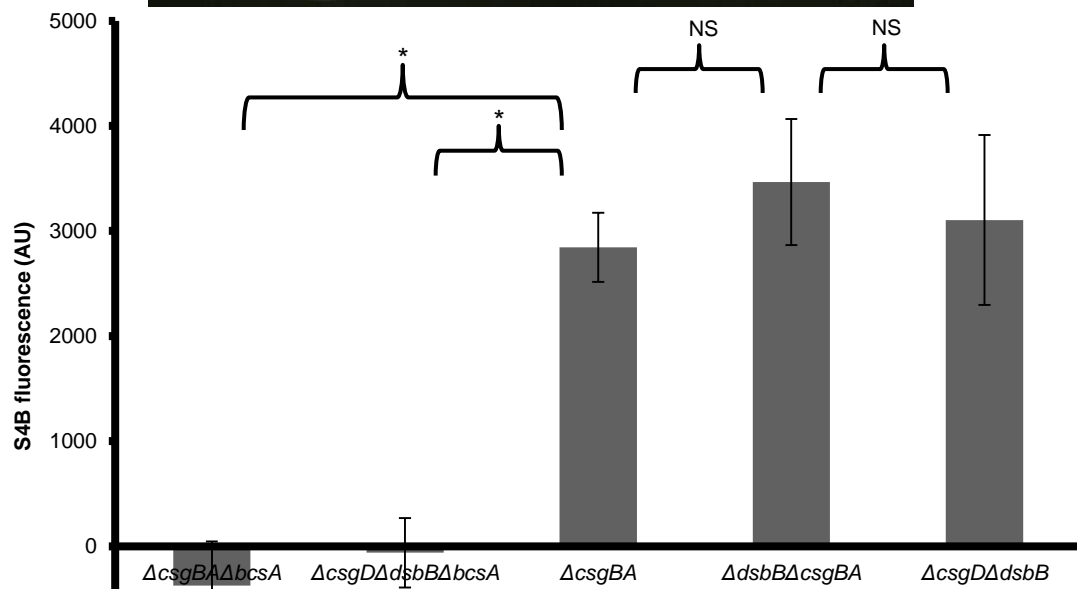**B**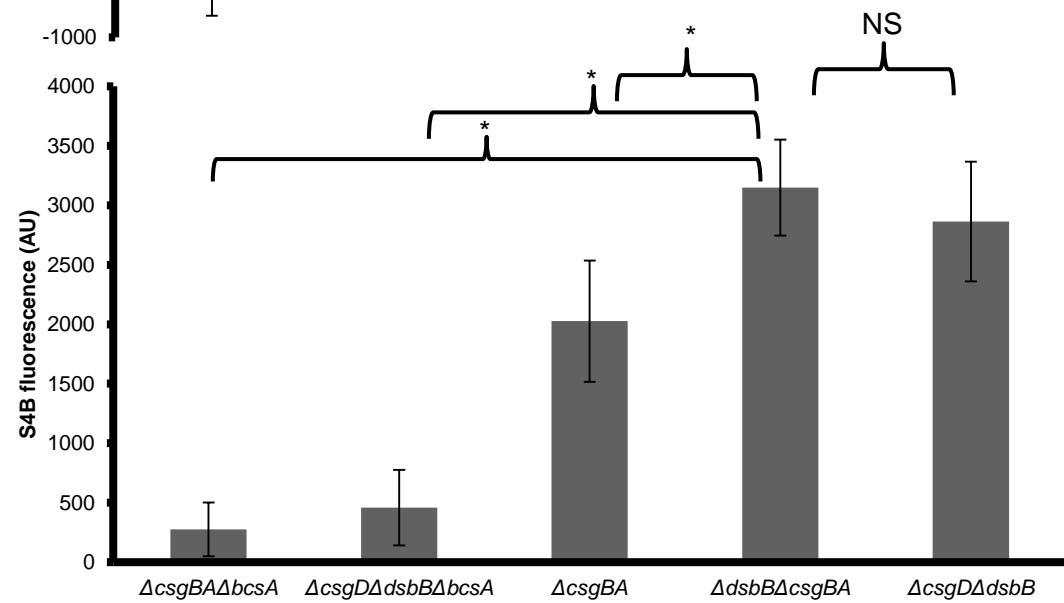

**A**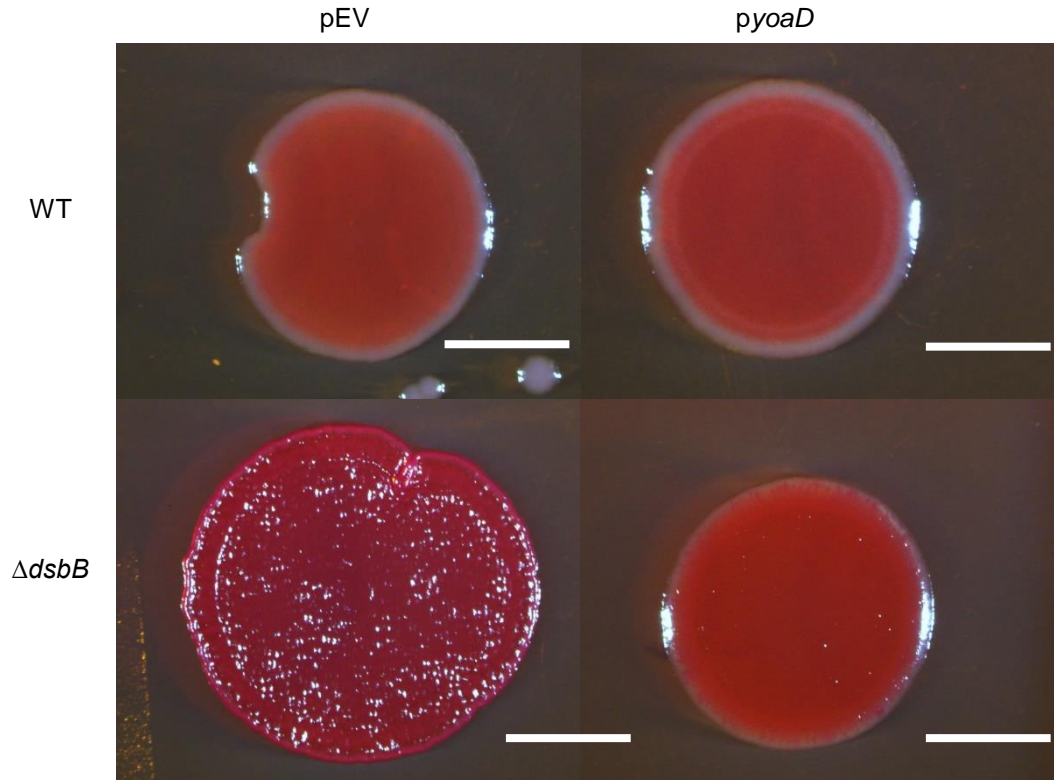**B**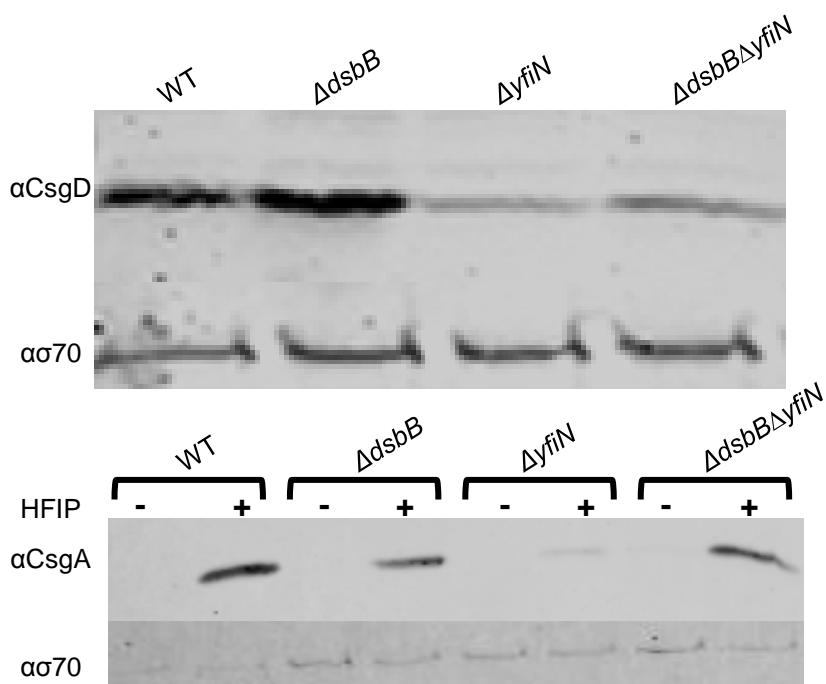

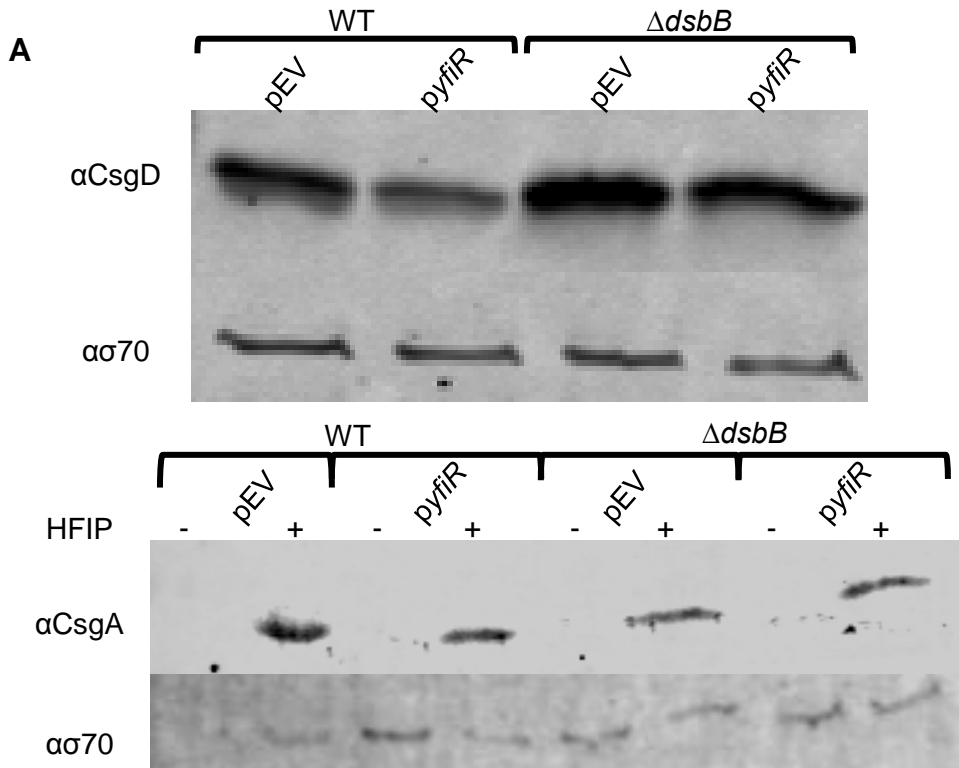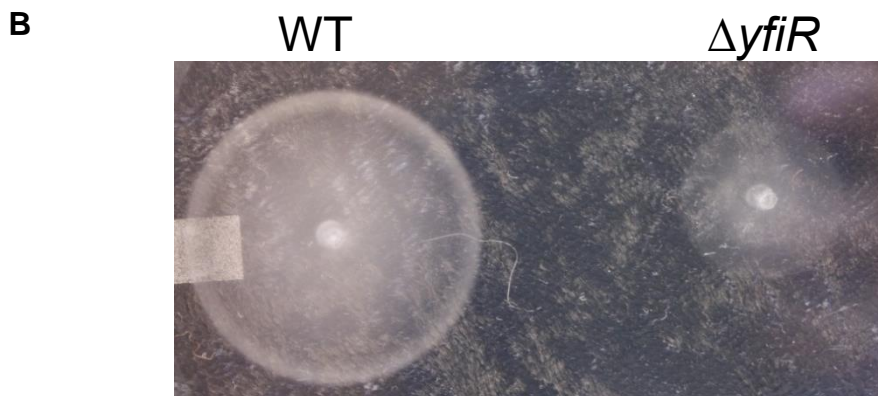

1 **Supplemental Figure 1. UTI89 WT,  $\Delta dsbB$ , and  $\Delta csgD\Delta dsbB$  have increased**  
2 **binding to the cellulose stain S4B even on LB plates.** A) In the top images, colonies  
3 were grown for 48 hours at 26°C on YESCA CR. Scale bars are 0.25cm. In the graph,  
4 the colonies were grown on YESCA for 48 hours at 26°C were stained with Pontamine  
5 Fast Scarlet 4B (S4B). Fluorescence readings were normalized by OD<sub>600</sub> and unstained  
6 cells fluorescence were subtracted from the stained cells fluorescence. Error bars are  
7 the standard deviation from biological triplicate samples. P-values were calculated using  
8 the student's two-tailed t-test (\*P-value<0.04). B) Colonies grown on LB plates at 26°C  
9 for 48 hours were stained with S4B. Fluorescence readings were normalized by OD<sub>600</sub>  
10 and unstained cells fluorescence were subtracted from the stained cells fluorescence.  
11 Error bars are the standard deviation from biological triplicate samples. P-values were  
12 calculated using the student's two-tailed t-test (P-value<0.03).

13 **Supplemental Figure 2.  $\Delta dsbB$  phenotype is dependent on c-di-GMP, and YfiN is**  
14 **necessary for normal CsgD expression.** A) WT and  $\Delta dsbB$  were transformed with  
15 pCKR101-EV and pCKR101-*yoaD*. Colonies were grown on YESCA CR plates with  
16 100 $\mu$ M IPTG at 26°C for 24 hours. B) Colonies were grown at 26°C for 48 hours for  
17  $\alpha$ CsgA and 24 hours for  $\alpha$ CsgD Western blots.

18 **Supplemental Figure 3. *yfiR* overexpression decreases CsgD levels in WT and**  
19  **$\Delta dsbB$  colonies.** A) Western Blot analysis was performed on colonies grown at 26°C  
20 on YESCA plates. Colonies used to analyze CsgA protein levels were grown for 48  
21 hours, while Western Blots used to analyze CsgD levels were grown for 24 hours. CsgA  
22 colony preps were treated with HFIP in order to solubilize CsgA fibers.  $\alpha\sigma70$  blots were

- 23 used as loading controls. B) 1  $\mu\text{L}$  of culture was inoculated into .25% YESCA motility
- 24 agar. Plates were incubated at 37°C for 5 hours.

1 Supplemental Table 1

| Gene        | Number | Encoded protein's function                                                                                           |
|-------------|--------|----------------------------------------------------------------------------------------------------------------------|
| <i>bcsA</i> | 4      | Cellulose synthase (3)                                                                                               |
| <i>bcsB</i> | 8      | Involved in biosynthesis of cellulose (3)                                                                            |
| <i>bcsC</i> | 11     | Involved in biosynthesis of cellulose (3)                                                                            |
| <i>bcsE</i> | 2      | Involved in biosynthesis of cellulose (3)                                                                            |
| <i>galU</i> | 3      | UTP-glucose-1-phosphate uridylyltransferase, which produces UDP-D-glucose, the building block of cellulose (40)      |
| <i>nhaA</i> | 1      | Sodium antiporter (41)                                                                                               |
| <i>nrdB</i> | 1      | B2 protein of ribonucleoside-diphosphate reductase. Involved in production of deoxynucleotides from nucleotides (42) |
| <i>seqA</i> | 1      | Involved in the regulation of DNA replication (44)                                                                   |
| <i>yfiN</i> | 1      | Inner membrane diguanylate cyclase (46, 47)                                                                          |

2

3 Plasmid list

| Plasmids                            | Reference                    | Notes                                                                                                                                                                                                            |
|-------------------------------------|------------------------------|------------------------------------------------------------------------------------------------------------------------------------------------------------------------------------------------------------------|
| pRJ800                              | DePas <i>et al.</i> 2013     |                                                                                                                                                                                                                  |
| pRJ800- <i>adrA</i>                 | DePas <i>et al.</i> 2013     |                                                                                                                                                                                                                  |
| pRJ800-16s                          | DePas <i>et al.</i> 2013     |                                                                                                                                                                                                                  |
| pCKR101                             | DePas <i>et al.</i> 2013(20) |                                                                                                                                                                                                                  |
| pCKR101- <i>yfiR</i>                | This study                   | <i>yfiR</i> amplified with primers DH165 and DH166 subcloned into pCKR101 at the KpnI and XbaI sites.                                                                                                            |
| pCKR101- <i>yfiR</i> <sup>his</sup> | This study                   | <i>yfiR</i> amplified with primers DH165 and DH167 subcloned into pCKR101 at the KpnI and XbaI sites.                                                                                                            |
| pCKR101- <i>yoaD</i>                | This study                   | <i>yoaD</i> amplified with primers DH62 and DH63 subcloned into pCKR101 at the KpnI and XbaI sites.                                                                                                              |
| pCKR101- <i>bcsA</i> <sup>WT</sup>  | This study                   | <i>bcsA</i> amplified with primers DH36 and DH37 subcloned into pCKR101 at the KpnI and XbaI sites.                                                                                                              |
| pCKR101- <i>bcsA</i> <sup>1</sup>   | This study                   | <i>bcsA</i> PilZ mutant 1 initially amplified with primers DH36&DH45 and DH37&DH44 followed by amplification of first PCR products with primers DH36 and DH37 subcloned into pCKR101 at the KpnI and XbaI sites. |
| pCKR101- <i>bcsA</i> <sup>2</sup>   | This study                   | <i>bcsA</i> PilZ mutant 2 initially amplified with primers DH36&DH47 and DH37&DH46 followed by amplification of first PCR products with primers DH36 and DH37 subcloned into pCKR101 at the KpnI and XbaI sites. |
| pFD1                                | Rubin <i>et al.</i> 1999     |                                                                                                                                                                                                                  |
| pCKR101- <i>yfiB</i>                | This study                   | <i>yfiB</i> amplified with primers DH168 and DH169 subcloned into pCKR101 at the KpnI and XbaI sites.                                                                                                            |

4

5 19. Depas WH, Hufnagel DA, Lee JS, Blanco LP, Bernstein HC, *et al.* (2013) Iron  
6 induces bimodal population development by *Escherichia coli*. Proc Natl Acad Sci U S A  
7 110: 2629-2634.

8 28. Rubin EJ, Akerley BJ, Novik VN, Lampe DJ, Husson RN, et al. (1999) In vivo  
9 transposition of mariner-based elements in enteric bacteria and mycobacteria. Proc Natl  
10 Acad Sci U S A 96: 1645-1650.

11 Primer List

| name  | description                           | sequence                                                                                         |
|-------|---------------------------------------|--------------------------------------------------------------------------------------------------|
| DH32  | pRJ800 lacZ 16s F                     | GAT CGG ATC CTA TAC CGA TTG GGA GCA GGT                                                          |
| DH33  | pRJ800 lacZ 16s R                     | GAT CTC TAG AAA AAG TTT GAT GCT CGT GAA TTA AA                                                   |
| DH34  | pRJ800 lacZ <i>adrA</i> F             | GAT CGG ATC CCA AAA GAT GCG CGA ATG TAA TAA TC                                                   |
| DH35  | pRJ800 lacZ <i>adrA</i> R             | GAT CTC TAG ATC AGA AAC AAT TTT CCC AAA TTA TA                                                   |
| DH36  | <i>bcsA</i> F KpnI pCKR101 SOE        | GAT CGG TAC CAT GAG TAT CCT GAC CCG GTG                                                          |
| DH37  | <i>bcsA</i> R XbaI pCKR101 SOE        | GAT CTC TAG ATC ATT GTT GAG CCA AAG CCT                                                          |
| DH44  | <i>bcsA</i> pilZ pckr101 mut1 C F     | GCA AAC AGG TAG ACC GAT CGC ACC G                                                                |
| DH45  | <i>bcsA</i> pilZ pckr101 mut1 B R     | CGG TGC GAT CGG TCT ACC TGT TTG C                                                                |
| DH46  | <i>bcsA</i> pilZ pckr101 mut2 C F     | GCC GAT CGC ACG ACG TGG AGA TGA C                                                                |
| DH47  | <i>bcsA</i> pilZ pckr101 mut2 B R     | GTC ATC TCC ACG TCG TGC GAT CGG C                                                                |
| DH62  | <i>yoaD</i> F KpnI pckr101            | GAT CGG TAC CTT GTC GCC ATA CGC TTA CAG                                                          |
| DH63  | <i>yoaD</i> R XbaI pckr101            | GAT CTC TAG ATT AAC GTA ACG GCA TAA TGG                                                          |
| DH74  | prj800 <i>yoaD</i> F BamHI            | GAT CGG ATC CTG CAG GGC AAG TTC AGG T                                                            |
| DH75  | pRJ800 <i>yoaD</i> R XbaI             | GAT CTC TAG AAC GCC TGA CGC AAC AGT GGA                                                          |
| DH149 | UT189 <i>yfiN</i> RS F                | TCT TAA TAA GCG CCC CAC GTT TAA AAG AGC ATT ACG CAA<br>CAT CAG TAT GAG TGT AGG CTG GAG CTG CTT C |
| DH150 | UT189 <i>yfiN</i> RS R                | AGG TGC TTT ATC ATA TCG ATA TAT CCT TGT TAT CTC ACC<br>AGC TTT TCG GCC ATA TGA ATA TCC TCC TTA G |
| DH151 | UT189 <i>yfiR</i> RS F                | TGA AAA AAT ATC GAT GCA TTT CGA GCG AAG ATG GTG AGG<br>ATC CCT GAA TGG TGT AGG CTG GAG CTG CTT C |
| DH152 | UT189 <i>yfiR</i> RS R                | CGA GCA TTA AGA CAT CCG GGT TGA CTT TTA CAC CGC TAC<br>GAG ATA AAG CAC ATA TGA ATA TCC TCC TTA G |
| DH157 | UT189 <i>yfiB</i> RS F                | CAA GGA TAT ATC GAT ATG ATA AAG CAC CTG CTA GCA CCC<br>CTG ATT TTC ACG TGT AGG CTG GAG CTG CTT C |
| DH158 | UT189 <i>yfiB</i> RS R                | GCT GGC CCT TTT TTT GTC TGT TTG CTC GTG TTT TAA GGG<br>GTT GTA ATC ACC ATA TGA ATA TCC TCC TTA G |
| DH165 | UT189 pckr101 KpnI <i>yfiR</i> F      | GAT CGG TAC CAT GCG TTT TTC TCA CCG ACT                                                          |
| DH166 | UT189 pckr101 XbaI <i>yfiR</i> R      | GAT CTC TAG ATT ATC CAT CAT TTT TCT TCC                                                          |
| DH167 | UT189 pckr101 XbaI <i>yfiR</i> R HisT | GAT CTC TAG ATT AGT GAT GGT GAT GGT GAT GTC CAT CAT<br>TTT TCT TCC                               |
| DH168 | UT189 pckr101 KpnI <i>yfiB</i> F      | GAT CGG TAC CAT GAT AAA GCA CCT GCT AGC                                                          |
| DH169 | UT189 pckr101 XbaI <i>yfiB</i> R      | GAT CTC TAG ATT AAG GGG TTG TAA TCA CCA                                                          |
| WD277 | UT189 <i>dsbA</i> RS left             | TTC ACG GGC TTT ATG TAA TTT ACA TTG AAT TAT TTT TTC<br>TCG GAC AGA TAG TGT AGG CTG GAG CTG CTT C |
| WD278 | UT189 <i>dsbA</i> RS right            | ACC CCC TTT GCA ATT AAC ACC TAT GTA TTA ATC GGA GAG<br>AGT AGA TCA TGC ATA TGA ATA TCC TCC TTA G |
| WD273 | UT189 <i>dsbB</i> RS left             | AAA GCG CTC CCG CAG GAG CGC CGA ATG GAT TAG CGA<br>CCG AAC AGG TCA CGC ATA TGA ATA TCC TCC TTA G |
| WD274 | UT189 <i>dsbB</i> RS right            | GAA TTG GTT TAA ACT GCG CAC TCT ATG CAT ATT GCA GGG<br>AAA TGA TTA TGG TGT AGG CTG GAG CTG CTT C |
| WD99  | <i>adrA</i> Red swap left. Use w/     | CTT CTG CCT TTA GCC CCG TCT CTA TAA TTT GGG AAA ATT                                              |

|       |                                                             |                                                                                                  |
|-------|-------------------------------------------------------------|--------------------------------------------------------------------------------------------------|
|       | WD100 in UTI89.                                             | GTT TCT GAA TGG TGT AGG CTG GAG CTG CTT C                                                        |
| WD100 | adrA Red swap right. Use w/ WD99 in UTI89.                  | CAG CAA ATC CTG ATG GCT TTT GCC GGA CGT CAG GCC<br>GCC ACT TCG GTG CGC ATA TGA ATA TCC TCC TTA G |
| WD36  | UTI89 <i>csgD</i> Red swap primer F. Use w/ pKD4 and WD 37. | CAA TCC AGC GTA AAT AAC GTT TCA TGG CTT TAT CGC CTG<br>AGG TTA TCG TTC ATA TGA ATA TCC TCC TTA   |
| WD37  | UTI89 <i>csgD</i> Red swap primer R. Use w/ pKD4 and WD36   | GAG GCA GCT GTC AGG TGT GCG ATC AAT AAA AAA AGC<br>GGG GTT TCA TCA TGG TGT AGG CTG GAG CTG CTT C |
| WD6   | Red swap F primer for deleting <i>csgBA</i> in UTI89.       | AAA TAC AGG TTG CGT TAA CAA CCA AGT TGA AAT GAT TTA<br>ATT TCT TAA GTG TGT AGG CTG GAG CTG CTT   |
| WD7   | Red swap R primer for deleting <i>csgBA</i> in UTI89.       | CGA AAA AAA ACA GGG CTT GCG CCC TGT TTC TTT AAT ACA<br>GAG GAT GTA TAT GAA TAT CCT CCT TAG       |
| WD349 | <i>bcsA</i> UTI89 RS F                                      | TGC CTG TTA AAC TAT TCC GGG CTG AAA ATG CCA GTC<br>GGG AGT GCA TCA TGC ATA TGA ATA TCC TCC TTA G |
| WD350 | <i>bcsA</i> UTI89 RS R                                      | AGA ATA TTT TTC TTT TCA TCG CGT TAT CAT CAT TGT TGA<br>GCC AAA GCC TGG TGT AGG CTG GAG CTG CTT C |
| NDH89 | Mariner 1                                                   | GGC CAC GCG TGC ACT AGT ACN NNN NNN TAC NG                                                       |
| NDH90 | Mariner 2                                                   | ATG CAT TTA ATA CTA GCG ACG C                                                                    |
| NDH91 | Mariner 3                                                   | GGC CAC GCG TGC ACT AGT AC                                                                       |
| NDH92 | Mariner 4                                                   | GCG ATC TAT GTG TCA GAC CGG                                                                      |

12

13 Strain List

| Strain Name | Strain Genotype                                                      | Reference                 | Notes                                                                                                                                                                                    |
|-------------|----------------------------------------------------------------------|---------------------------|------------------------------------------------------------------------------------------------------------------------------------------------------------------------------------------|
|             | UTI89                                                                | Mulvey <i>et al.</i> 2001 |                                                                                                                                                                                          |
|             | UTI89 $\Delta$ <i>csgD</i>                                           | DePas <i>et al.</i> 2013  |                                                                                                                                                                                          |
|             | UTI89 $\Delta$ <i>csgBA</i>                                          | DePas <i>et al.</i> 2013  |                                                                                                                                                                                          |
|             | UTI89 $\Delta$ <i>bcsA</i>                                           | DePas <i>et al.</i> 2013  |                                                                                                                                                                                          |
| CL-1484     | UTI89 $\Delta$ <i>dsbA</i>                                           | This study                | Red Swap mutagenesis of UTI89 with primers WD277 and WD288 followed by electroporation with the recombinase PCP20 to remove kanamycin cassette                                           |
| CL-1291     | UTI89 $\Delta$ <i>dsbB</i>                                           | This study                | Red Swap mutagenesis of UTI89 with primers WD273 and WD274 followed by electroporation with the recombinase PCP20 to remove kanamycin cassette                                           |
| CL-1413     | UTI89 $\Delta$ <i>dsbB</i> pRJ800- <i>adrA</i>                       | This study                | UTI89 $\Delta$ <i>dsbB</i> electroporated with prj800- <i>adrA</i>                                                                                                                       |
| CL-1414     | UTI89 $\Delta$ <i>dsbB</i> pRJ800-16s                                | This study                | UTI89 $\Delta$ <i>dsbB</i> electroporated with prj800-16s                                                                                                                                |
| CL-1415     | UTI89 $\Delta$ <i>dsbB</i> pRJ800                                    | This study                | UTI89 $\Delta$ <i>dsbB</i> electroporated with prj800                                                                                                                                    |
|             | UTI89 pRJ800- <i>adrA</i>                                            | DePas <i>et al.</i> 2013  |                                                                                                                                                                                          |
|             | UTI89 pRJ800-16s                                                     | DePas <i>et al.</i> 2013  |                                                                                                                                                                                          |
|             | UTI89 pRJ800                                                         | DePas <i>et al.</i> 2013  |                                                                                                                                                                                          |
| CL-1869     | UTI89 $\Delta$ <i>dsbB</i> $\Delta$ <i>csgBA</i>                     | This study                | Red Swap mutagenesis of UTI89 $\Delta$ <i>dsbB</i> with primers WD6 and WD7 followed by electroporation with the recombinase PCP20 to remove kanamycin cassette                          |
| CL-1866     | UTI89 $\Delta$ <i>dsbB</i> $\Delta$ <i>bcsA</i>                      | This study                | Red Swap mutagenesis of UTI89 $\Delta$ <i>dsbB</i> with primers WD349 and WD350 followed by electroporation with the recombinase PCP20 to remove kanamycin cassette                      |
| CL-1354     | UTI89 $\Delta$ <i>csgD</i> $\Delta$ <i>dsbB</i>                      | This study                | Red Swap mutagenesis of UTI89 $\Delta$ <i>csgD</i> with primers WD273 and WD274 followed by electroporation with the recombinase PCP20 to remove kanamycin cassette                      |
| CL-1394     | UTI89 $\Delta$ <i>csgD</i> $\Delta$ <i>dsbB</i> $\Delta$ <i>bcsA</i> | This study                | Red Swap mutagenesis of UTI89 $\Delta$ <i>csgD</i> $\Delta$ <i>dsbB</i> with primers WD349 and WD350 followed by electroporation with the recombinase PCP20 to remove kanamycin cassette |
| CL-1543     | UTI89 $\Delta$ <i>dsbB</i> $\Delta$ <i>adrA</i>                      | This study                | Red Swap mutagenesis of UTI89 $\Delta$ <i>dsbB</i> with primers WD99 and WD100 followed by electroporation with the recombinase PCP20 to remove kanamycin cassette                       |



|         |                                                                              |                          |                                                                                                                                                                         |
|---------|------------------------------------------------------------------------------|--------------------------|-------------------------------------------------------------------------------------------------------------------------------------------------------------------------|
| CL-1393 | UTI89 $\Delta csgD\Delta dsbB\Delta adrA$                                    | This study               | Red Swap mutagenesis of UTI89 $\Delta csgD\Delta dsbB$ with primers WD99 and WD100 followed by electroporation with the recombinase PCP20 to remove kanamycin cassette  |
| CL-1355 | UTI89 $\Delta csgD\Delta dsbA$                                               | This study               | Red Swap mutagenesis of UTI89 $\Delta csgD$ with primers WD277 and WD278 followed by electroporation with the recombinase PCP20 to remove kanamycin cassette            |
| CL-1827 | UTI89 $\Delta csgD\Delta dsbB\Delta yfiN$                                    | This study               | Red Swap mutagenesis of UTI89 $\Delta csgD\Delta dsbB$ with primers DH149 and DH150 followed by electroporation with the recombinase PCP20 to remove kanamycin cassette |
| CL-1825 | UTI89 $\Delta yfiN$                                                          | This study               | Red Swap mutagenesis of UTI89 with primers DH149 and DH150 followed by electroporation with the recombinase PCP20 to remove kanamycin cassette                          |
| CL-1826 | UTI89 $\Delta yfiR$                                                          | This study               | Red Swap mutagenesis of UTI89 with primers DH151 and DH152 followed by electroporation with the recombinase PCP20 to remove kanamycin cassette                          |
| CL-1837 | UTI89 $\Delta csgD\Delta yfiR$                                               | This study               | Red Swap mutagenesis of UTI89 $\Delta csgD$ with primers DH151 and DH152 followed by electroporation with the recombinase PCP20 to remove kanamycin cassette            |
| CL-1828 | UTI89 $\Delta yfiB$                                                          | This study               | Red Swap mutagenesis of UTI89 with primers DH157 and DH158 followed by electroporation with the recombinase PCP20 to remove kanamycin cassette                          |
|         | UTI89 pCKR101                                                                | DePas <i>et al.</i> 2013 |                                                                                                                                                                         |
| CL-1840 | UTI89 pCKR101- <i>yfiR</i>                                                   | This study               | UTI89 electroporated with pCKR101- <i>yfiR</i>                                                                                                                          |
| CL-1883 | UTI89 pCKR101- <i>yfiR</i> <sup>His</sup>                                    | This study               | UTI89 electroporated with pCKR101- <i>yfiR</i> <sup>His</sup>                                                                                                           |
| CL-1646 | UTI89 $\Delta dsbA$ pCKR101                                                  | This study               | UTI89 $\Delta dsbA$ electroporated with pCKR101                                                                                                                         |
| CL-1884 | UTI89 $\Delta dsbA$ pCKR101- <i>yfiR</i> <sup>His</sup>                      | This study               | UTI89 $\Delta dsbA$ electroporated with pCKR101- <i>yfiR</i> <sup>His</sup>                                                                                             |
| CL-1532 | UTI89 $\Delta dsbB$ pCKR101                                                  | This study               | UTI89 $\Delta dsbB$ electroporated with pCKR101                                                                                                                         |
| CL-1841 | UTI89 $\Delta dsbB$ pCKR101- <i>yfiR</i>                                     | This study               | UTI89 $\Delta dsbB$ electroporated with pCKR101- <i>yfiR</i>                                                                                                            |
| CL-1539 | UTI89 $\Delta csgD\Delta dsbB$ pCKR101                                       | This study               | UTI89 $\Delta csgD\Delta dsbB$ electroporated with pCKR101                                                                                                              |
| CL-1842 | UTI89 $\Delta csgD\Delta dsbB$ pCKR101- <i>yfiR</i>                          | This study               | UTI89 $\Delta csgD\Delta dsbB$ electroporated with pCKR101- <i>yfiR</i>                                                                                                 |
|         | UTI89 $\Delta csgBA\Delta bcsA$                                              | DePas <i>et al.</i> 2013 |                                                                                                                                                                         |
| CL-1394 | UTI89 $\Delta csgD\Delta dsbB\Delta bcsA$                                    | This study               | Red Swap mutagenesis of UTI89 $\Delta csgD\Delta dsbB$ with primers DH349 and DH350                                                                                     |
| CL-1525 | UTI89 pckr101- <i>yoaD</i>                                                   | This study               | UTI89 electroporated with pCKR101- <i>yoaD</i>                                                                                                                          |
| CL-1526 | UTI89 $\Delta dsbB$ pCKR101- <i>yoaD</i>                                     | This study               | UTI89 $\Delta dsbB$ electroporated with pCKR101- <i>yoaD</i>                                                                                                            |
| CL-1473 | UTI89 $\Delta csgD\Delta dsbB\Delta bcsA$ pCKR101- <i>bcsA</i> <sup>WT</sup> | This study               | UTI89 electroporated with pCKR101- <i>bcsA</i> <sup>WT</sup>                                                                                                            |
| CL-1471 | UTI89 $\Delta csgD\Delta dsbB\Delta bcsA$ pCKR101- <i>bcsA</i> <sup>1</sup>  | This study               | UTI89 electroporated with pCKR101- <i>bcsA</i> <sup>1</sup>                                                                                                             |
| CL-1472 | UTI89 $\Delta csgD\Delta dsbB\Delta bcsA$ pCKR101- <i>bcsA</i> <sup>2</sup>  | This study               | UTI89 electroporated with pCKR101- <i>bcsA</i> <sup>2</sup>                                                                                                             |
| CL-1470 | UTI89 $\Delta csgD\Delta dsbB\Delta bcsA$ pCKR101                            | This study               | UTI89 electroporated with pCKR101                                                                                                                                       |
| CL-1914 | UTI89 pCKR101- <i>yfiB</i>                                                   | This study               | UTI89 electroporated with pCKR101- <i>yfiB</i>                                                                                                                          |

- 14 77. Mulvey MA, Schilling JD, Hultgren SJ (2001) Establishment of a persistent  
15 *Escherichia coli* reservoir during the acute phase of a bladder infection. Infect Immun  
16 69: 4572-4579.
- 17 19. Depas WH, Hufnagel DA, Lee JS, Blanco LP, Bernstein HC, *et al.* (2013) Iron  
18 induces bimodal population development by *Escherichia coli*. Proc Natl Acad Sci U S A  
19 110: 2629-2634.

20

21

22

23
